# Supplementary material
Source: Springer Nature journal article supplement (https://www.springermedizin.de/resource/supplementary/12936_2007_459_MOESM1_ESM.pdf/9547494)
Supplement: MOESM1 [file 9547494]

**Table S1.** Amino acid polymorphisms at domain I of the *P. falciparum* AMA1 antigen among Indian isolates (n = 157)

| Haplotypes | No. of Isolates | Positions of codons and amino acid substitutions |   |   |   |   |   |   |   |   |   |   |   |   |   |   |   |   |   |   |   |   |   |   |   |   |   |   |   |   |   |   |   |   |
|------------|-----------------|--------------------------------------------------|---|---|---|---|---|---|---|---|---|---|---|---|---|---|---|---|---|---|---|---|---|---|---|---|---|---|---|---|---|---|---|---|
|            |                 | 1                                                | 1 | 1 | 1 | 1 | 1 | 1 | 1 | 1 | 1 | 1 | 2 | 2 | 2 | 2 | 2 | 2 | 2 | 2 | 2 | 2 | 2 | 2 | 2 | 2 |   |   |   |   |   |   |   |   |
|            |                 | 6                                                | 6 | 7 | 7 | 7 | 8 | 8 | 9 | 9 | 9 | 9 | 0 | 0 | 0 | 0 | 0 | 1 | 2 | 2 | 3 | 4 | 4 | 4 | 6 | 6 | 8 | 8 | 8 | 9 |   |   |   |   |
| 3D7*       | 1               | N                                                | T | G | N | Y | E | L | M | D | E | R | H | F | D | K | Y | S | I | N | K | D | K | D | E | K | I | S | Q | D |   |   |   |   |
| H1         | 1               | -                                                | K | - | - | D | N | - | I | - | D | - | R | V | - | E | - | - | N | - | - | Y | E | - | Q | - | K | L | - | - |   |   |   |   |
| H2         | 1               | -                                                | - | V | - | D | K | - | - | - | D | - | L | L | - | E | D | - | - | - | - | - | - | - | - | - | K | L | E | - |   |   |   |   |
| H3         | 1               | -                                                | - | - | - | D | N | - | - | N | D | - | D | - | N | E | - | - | N | - | E | Y | E | - | Q | - | K | L | - | - |   |   |   |   |
| H4         | 1               | -                                                | - | - | - | D | - | - | I | - | D | - | D | - | N | E | - | - | N | - | E | Y | - | - | Q | - | K | L | E | H |   |   |   |   |
| H5         | 1               | K                                                | - | - | K | D | N | - | I | N | G | K | D | - | - | E | D | - | N | K | E | Y | - | - | - | K | - | - | - |   |   |   |   |   |
| H6         | 1               | K                                                | - | E | - | D | K | - | - | - | D | - | D | - | - | E | - | - | N | - | - | Y | - | - | Q | - | K | - | - | - |   |   |   |   |
| H7         | 1               | -                                                | - | - | K | D | - | - | I | - | D | - | D | - | N | E | - | - | N | - | Q | Y | E | - | Q | - | K | L | E | - |   |   |   |   |
| H8         | 1               | -                                                | - | E | K | D | N | - | - | - | Q | - | - | - | - | E | - | - | N | - | E | Y | - | - | - | - | - | - | - | H |   |   |   |   |
| H9         | 1               | K                                                | - | E | - | D | - | - | I | - | D | - | D | S | - | E | - | - | N | - | E | Y | - | - | - | K | - | - | - |   |   |   |   |   |
| H10        | 1               | -                                                | - | E | - | D | D | - | - | N | D | - | - | - | - | E | - | - | N | - | - | Y | N | - | Q | - | K | - | - | - |   |   |   |   |
| H11        | 1               | -                                                | - | E | - | D | - | - | - | - | Q | - | - | - | - | - | - | - | - | - | - | - | - | - | Q | I | - | - | - | - |   |   |   |   |
| H12        | 1               | -                                                | - | - | - | D | K | - | I | - | D | - | D | - | N | E | - | - | N | - | E | Y | - | - | Q | - | K | L | E | H |   |   |   |   |
| H13        | 1               | -                                                | - | - | - | D | D | - | - | N | G | - | D | - | N | E | - | - | N | - | E | Y | - | - | Q | - | K | L | - | - |   |   |   |   |
| H14        | 1               | -                                                | - | - | K | D | N | - | I | N | G | K | D | - | - | E | - | - | N | - | E | Y | - | - | Q | - | K | - | - | - |   |   |   |   |
| H15        | 1               | -                                                | - | - | - | D | N | - | - | N | G | - | D | - | N | E | - | - | N | - | - | Y | N | - | Q | - | K | - | - | - |   |   |   |   |
| H16        | 1               | K                                                | - | E | - | D | - | - | I | - | D | - | D | S | - | E | - | - | N | - | Q | Y | E | - | Q | - | N | P | - | - |   |   |   |   |
| H17        | 1               | -                                                | - | E | - | D | N | P | - | - | Q | - | - | - | - | - | - | - | - | - | - | - | - | - | - | - | K | L | E | - |   |   |   |   |
| H18        | 1               | -                                                | - | E | - | D | - | - | - | - | D | - | R | - | - | E | - | - | N | - | - | Y | N | - | - | - | K | - | - | - |   |   |   |   |
| H19        | 1               | -                                                | - | E | - | D | K | - | - | - | Q | - | - | - | - | - | - | - | - | - | - | - | - | - | - | Y | E | - | Q | - | K | L | E | - |
| H20        | 1               | -                                                | - | E | - | D | - | - | - | - | Q | - | - | - | - | - | - | - | - | - | - | - | - | - | - | - | K | L | E | - |   |   |   |   |
| H21        | 1               | -                                                | - | - | - | D | - | - | - | - | D | - | - | - | - | E | - | - | - | - | - | - | - | - | - | - | - | - | - | - | - |   |   |   |
| H22        | 1               | -                                                | - | E | - | D | - | - | - | - | H | - | D | - | - | E | - | - | N | - | - | Y | N | - | - | - | K | - | - | - |   |   |   |   |
| H23        | 1               | -                                                | - | - | - | D | N | - | - | - | D | - | R | V | - | E | - | - | N | - | - | Y | E | - | Q | - | K | L | - | - |   |   |   |   |
| H24        | 1               | -                                                | - | - | - | D | N | - | - | - | G | - | D | - | - | E | - | - | N | - | - | Y | N | - | Q | - | K | L | E | - |   |   |   |   |
| H25        | 1               | -                                                | - | E | - | D | K | - | - | - | D | - | R | - | - | E | - | - | N | - | - | Y | N | - | Q | - | K | - | - | - |   |   |   |   |
| H26        | 1               | -                                                | - | - | - | - | - | - | - | - | D | - | L | L | G | E | D | - | N | - | - | Y | N | - | Q | - | K | - | - | - |   |   |   |   |

|     |    |   |   |   |   |   |   |   |   |   |   |   |   |   |   |   |   |   |   |   |   |   |   |   |   |   |   |   |   |   |
|-----|----|---|---|---|---|---|---|---|---|---|---|---|---|---|---|---|---|---|---|---|---|---|---|---|---|---|---|---|---|---|
| H27 | 1  | - | - | - | - | - | - | - | - | D | - | L | L | - | E | D | - | N | - | - | Y | N | - | Q | - | K | - | R | - |   |
| H28 | 1  | - | - | - | - | D | - | - | - | D | - | L | L | - | E | - | - | N | - | - | Y | N | - | Q | - | K | - | - | - |   |
| H29 | 1  | - | - | - | - | - | - | - | - | D | - | L | L | - | E | D | P | N | - | - | Y | N | - | Q | - | K | - | - | - |   |
| H30 | 1  | - | - | - | - | D | N | - | - | - | D | - | R | - | - | E | - | - | - | - | - | - | - | Q | - | K | L | E | - |   |
| H31 | 1  | - | - | - | - | - | - | - | - | D | - | L | L | - | E | V | - | N | - | - | Y | N | - | Q | - | K | - | - | - |   |
| H32 | 2  | - | - | - | - | - | - | - | - | D | - | L | L | - | E | D | - | N | - | - | Y | N | - | Q | - | K | - | - | - |   |
| H33 | 2  | - | K | - | - | D | - | - | I | - | D | - | D | - | N | E | - | - | N | - | Q | Y | E | - | Q | - | K | - | H |   |
| H34 | 2  | - | - | - | - | D | K | - | - | - | G | - | D | - | N | E | - | - | N | - | - | - | - | - | - | K | L | E | - |   |
| H35 | 2  | K | - | E | - | D | N | - | - | N | G | - | D | - | N | E | - | - | N | - | E | - | - | Q | - | K | - | - | - |   |
| H36 | 2  | K | - | E | - | D | K | - | - | - | H | - | D | - | - | E | - | - | N | - | - | Y | N | - | - | K | L | - | - |   |
| H37 | 2  | - | K | - | - | D | - | - | I | - | D | - | D | - | N | E | - | - | N | - | - | Y | E | - | Q | - | K | L | E | - |
| H38 | 2  | - | - | E | - | D | K | - | - | - | Q | - | - | - | - | - | - | - | - | - | - | - | - | - | - | K | L | E | - |   |
| H39 | 2  | K | - | E | - | D | - | - | - | - | Q | - | - | - | - | - | - | - | - | - | - | - | - | - | - | - | - | - | - |   |
| H40 | 2  | - | - | - | - | D | N | P | - | N | G | - | D | L | N | E | - | - | - | - | - | - | - | Q | I | - | - | - | - |   |
| H41 | 2  | - | K | - | - | D | N | - | I | - | Q | - | - | - | - | E | D | - | N | - | - | - | - | N | - | K | - | - | - |   |
| H42 | 2  | - | - | E | - | D | K | - | - | - | D | - | L | L | - | E | D | - | - | - | - | - | - | Q | - | K | L | - | H |   |
| H43 | 3  | - | - | - | - | D | N | P | - | N | G | - | D | L | N | E | - | - | N | - | E | - | - | - | - | K | - | - | - |   |
| H44 | 3  | - | - | E | - | D | K | - | - | - | Q | - | - | - | - | - | - | - | - | - | - | - | - | - | - | - | - | - | - |   |
| H45 | 3  | - | - | E | - | D | K | - | - | - | Q | - | R | - | - | E | - | - | N | - | - | Y | N | - | Q | - | K | - | - |   |
| H46 | 3  | - | K | - | - | D | N | - | I | N | G | - | D | - | N | E | - | - | N | - | E | - | - | - | - | K | - | - | - |   |
| H47 | 3  | - | K | - | - | D | - | - | I | - | D | - | D | - | N | E | - | - | N | - | - | Y | E | - | Q | - | K | L | - | H |
| H48 | 4  | - | - | - | K | D | N | - | I | N | G | - | D | - | N | E | - | - | N | - | E | - | - | - | - | K | - | - | - |   |
| H49 | 5  | - | - | - | - | D | N | - | - | N | G | - | D | - | N | E | - | - | N | - | E | - | - | - | Q | - | K | - | - | - |
| H50 | 5  | - | K | - | - | D | - | - | I | N | G | - | D | - | N | E | - | - | N | K | E | - | - | - | - | K | - | - | - |   |
| H51 | 5  | K | - | E | - | D | - | - | - | - | H | - | D | - | - | E | - | - | N | - | - | Y | N | - | - | K | - | - | - |   |
| H52 | 5  | - | - | - | - | - | - | - | - | D | - | L | L | - | E | D | - | N | - | - | Y | N | - | Q | - | K | - | - | - |   |
| H53 | 5  | - | K | - | - | D | N | - | I | N | G | - | D | - | - | E | D | - | N | - | - | Y | N | - | - | K | - | - | - |   |
| H54 | 6  | - | K | - | - | D | - | - | I | - | D | - | D | - | N | E | - | - | N | - | - | Y | E | - | - | K | L | E | H |   |
| H55 | 8  | - | - | - | - | D | - | - | - | N | V | - | D | - | N | E | - | - | N | - | - | - | - | Q | - | K | - | - | - |   |
| H56 | 21 | K | - | E | - | D | K | - | - | - | H | - | D | - | - | E | - | - | N | - | - | Y | N | - | - | K | - | - | - |   |
| H57 | 25 | - | K | - | - | D | N | - | I | N | G | - | D | - | N | E | - | - | N | - | - | Y | N | - | Q | - | K | L | E | - |

\*Accession numbers XP\_001348015; AAN35928, AAB36701, n; number of isolates
